# Supplementary material for: Development of low temperature stoichiometric solution combustion derived transparent conductive ternary zinc tin co-doped indium oxide electrodes
Source: Royal Society of Chemistry journal article supplement (doi:10.1039/c7ra09189c), 2017-01-01
Supplement: c7ra09189c1.pdf [file c7ra09189c1.pdf]

## Supplementary information

### Development of low temperature stoichiometric solution combustion derived transparent conductive ternary zinc tin co-doped indium oxide electrode

Pavan Pujar<sup>a,c</sup>, Srinivas Gnadla<sup>c</sup>, Mukesh Singh<sup>c</sup>, Bikesh Gupta<sup>a</sup>, Kartick Tarafder<sup>b</sup>, Dipti Gupta<sup>c</sup>,  
Yong-Young Noh<sup>d</sup>, Saumen Mandal<sup>a\*</sup>

<sup>a</sup>Department of Metallurgical and Materials Engineering, National Institute of Technology Karnataka (NITK), Surathkal-575025, India.

<sup>b</sup>Department of Physics, National Institute of Technology Karnataka (NITK), Surathkal-575025, India.

<sup>c</sup>Plastic Electronics and Energy Laboratory, Department of Metallurgical Engineering and Materials Science, Indian Institute of Technology Bombay, Powai 400 076, India.

<sup>d</sup>Department of Energy & Materials Engineering, Dongguk University, 30, Pildong-ro 1-gil, Jung-gu, Seoul, 04620, Republic of Korea

\*Corresponding author: E-mail: [smandal@nitk.edu.in](mailto:smandal@nitk.edu.in)

#### S1: Combustion synthesis of IZTO with varying F:O ratios

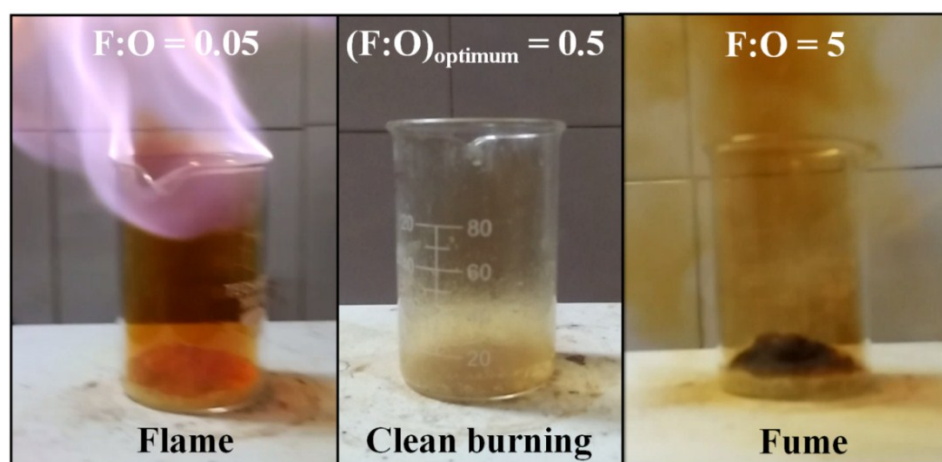

Fig. S1: Type of combustion reactions with varying F:O (= 0.05, 0.5 and 5); showing flame type (F:O = 0.05), smoldering type (F:O = 5) and clean burning (F:O = 0.5; optimum redox reaction).

The fumes in case of fuel rich (F:O = 5) mixture is due to burning of excess carbon.

## S2: Determination of precise lattice parameter of IZTO and combustion derived $\text{In}_2\text{O}_3$ powder

### a). Combustion synthesis of $\text{In}_2\text{O}_3$

$\text{In}_2\text{O}_3$  synthesized through similar combustion process using acetylacetone as fuel and 2-methoxyethanol via balanced redox reaction (Eq. S1) followed by calcination at 600 °C for two hours.

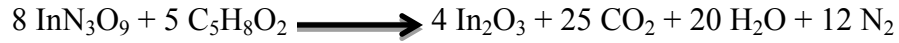

.... (Eq. S1)

### b). Determination of lattice parameter using Nelson Riley (NR) function

Precise lattice parameter can be determined using NR function  $(\frac{\cos^2\theta}{\sin\theta} + \frac{\cos^2\theta}{\theta})$ . Lattice parameter of IZTO is compared with  $\text{In}_2\text{O}_3$ . Fig. S2 (a) and (b), shows plot of NR function vs lattice parameters for both IZTO and  $\text{In}_2\text{O}_3$  respectively.

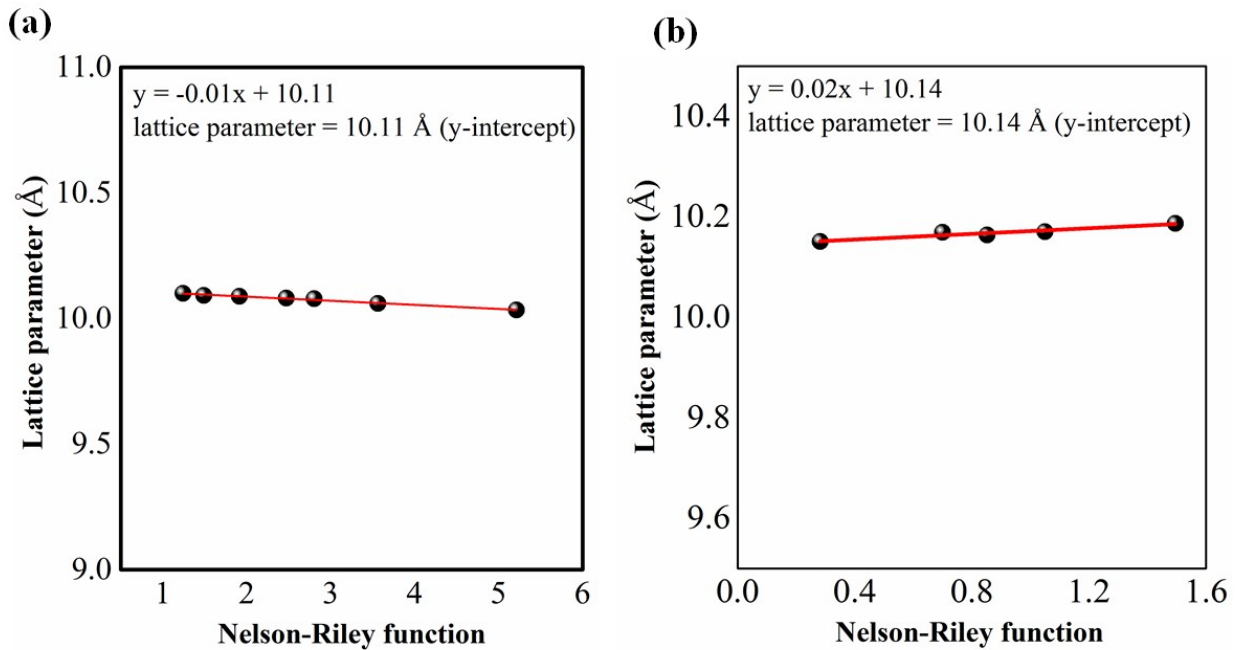

Fig. S2. Lattice parameter of (a)  $\text{In}_2\text{O}_3$  and (b) IZTO using NR function

### S3: Atom projected density of state of IZTO

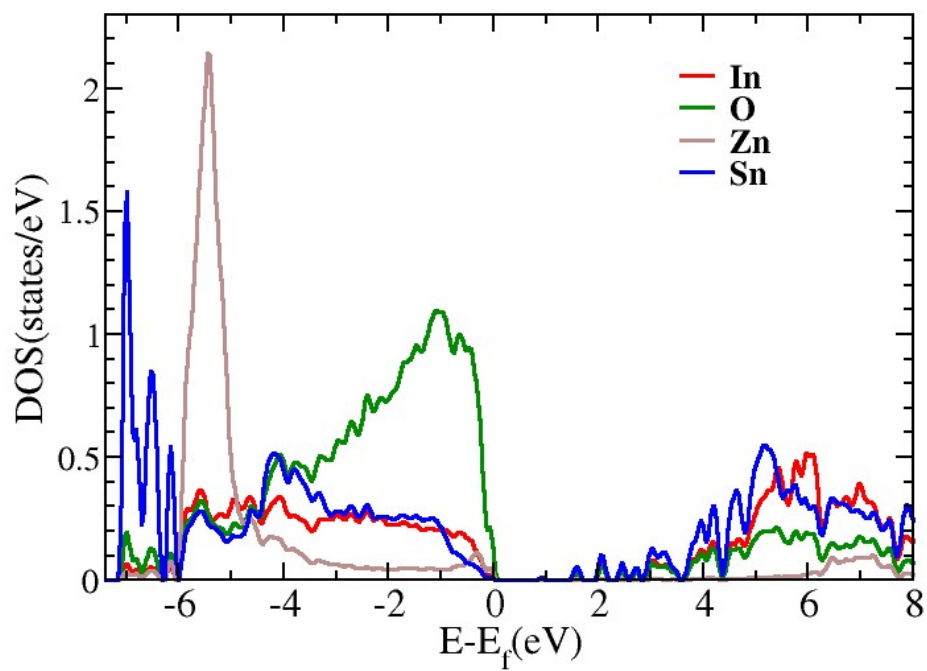

Fig. S3: The atom projected density of state of In, O, Zn and Sn are plotted with red green brown and blue color (online). Trap-states from doped Sn atom are visible in the band gap energy region.
